# Supplementary material for: Aryl Hydrocarbon Receptor Regulates Muc2 Production Independently of IL-22 during Colitis
Source: MDPI journal article supplement (doi:10.3390/ijms25042404), 2024-02-18
Supplement: s1 [file s1]

## Supplementation information

Aryl hydrocarbon receptor regulates Muc2 production independent of IL-22 during colitis

Archana Saxena, Chandani Mitchell, Raymond Bogdon, Kasie Roark, Kiesha Wilson, Shanieka Staley, Michelle Hailey, Michal Claire Williams, Alex Rutkovsky, Prakash Nagarkatti, Mitzi Nagarkatti, and Philip Brandon Busbee

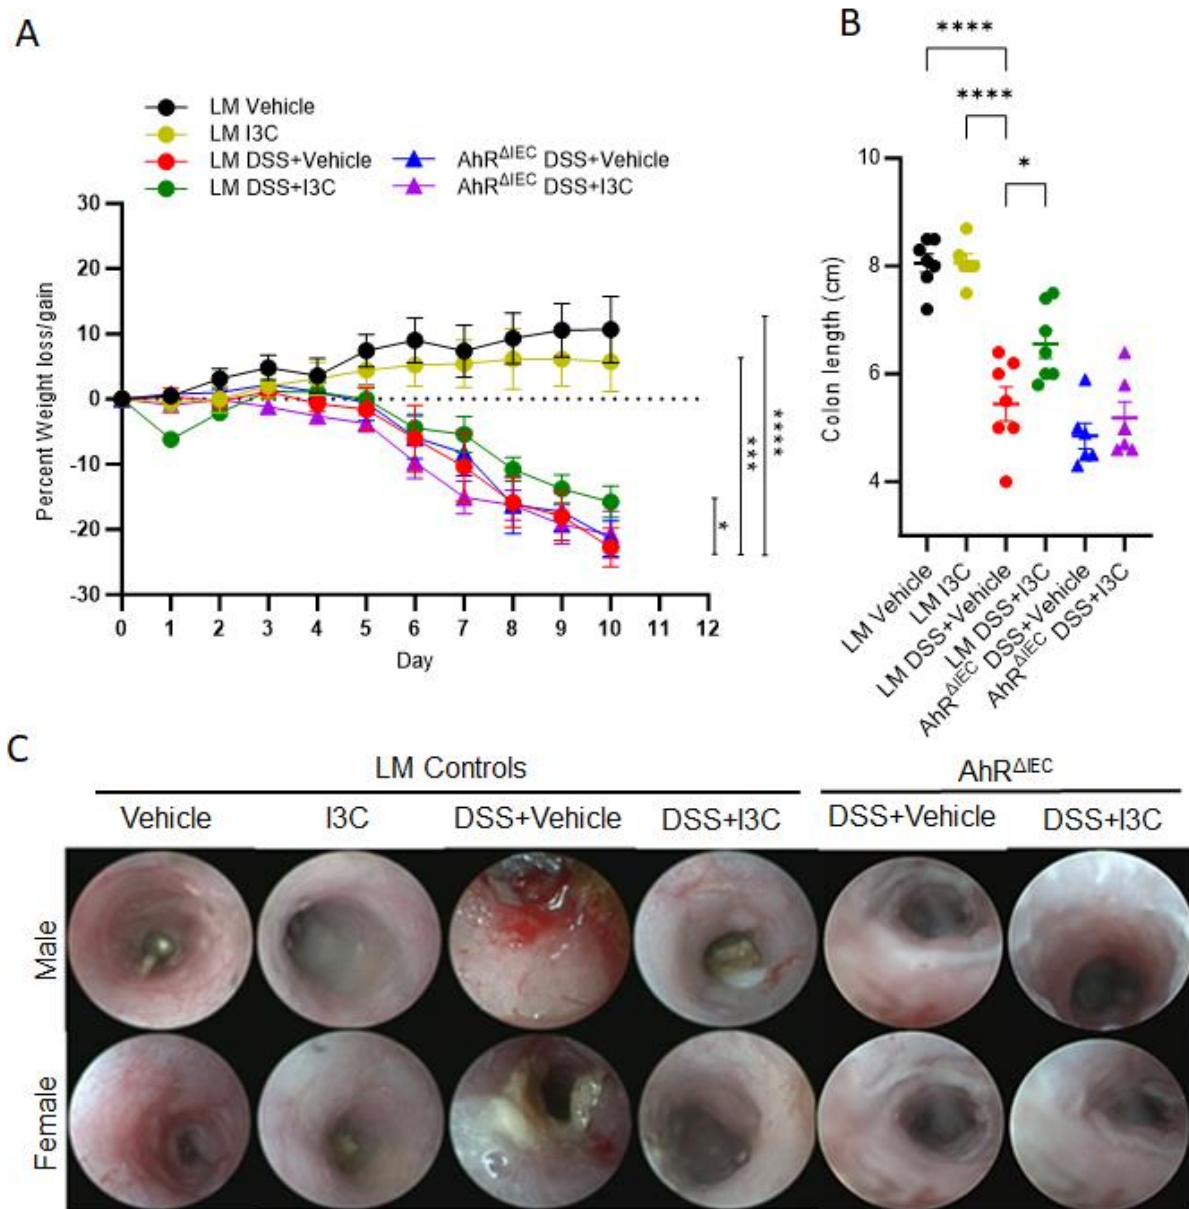

**Figure S1.** AhR expression in IECs is essential for I3C-mediated protection against DSS-induced colitis in littermate (LM) male and female mice, related to Figures 1-3. **(A)** Percent weight data. **(B)** Colon length. **(C)** Representative colonoscopy images taken on day 9 of DSS colitis from experimental groups. For dot plots, significance was determined using one-way ANOVA and Tukey's multiple comparisons test. For weight data over time, two-way ANOVA and Dunnett's multiple comparisons test was used to determine significance (\* $p < 0.05$ , \*\*\* $p < 0.005$ , \*\*\*\* $p < 0.001$ ).

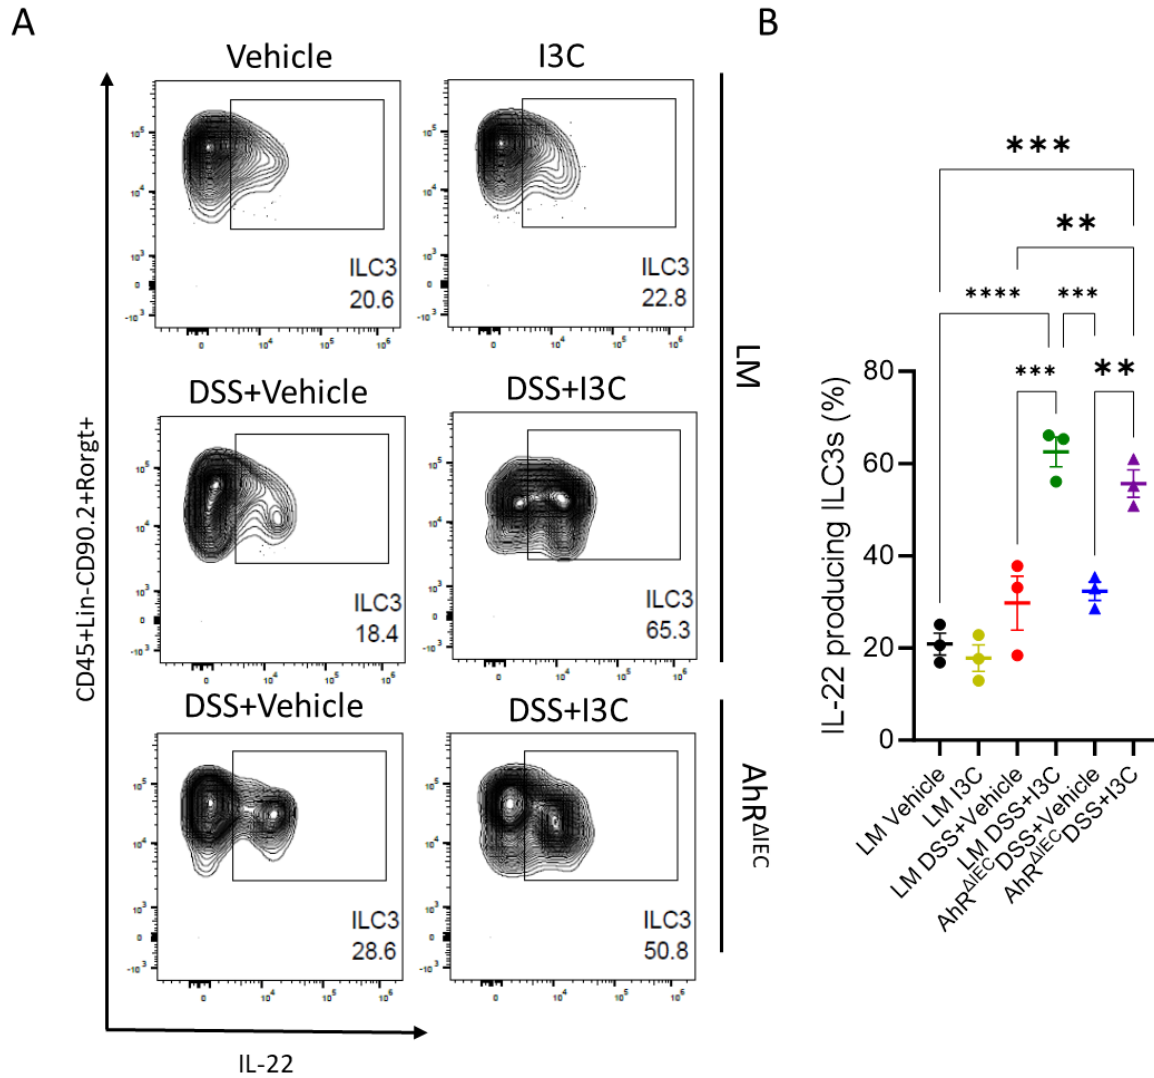

**Figure S2.** AhR expression in IECs does not impact production of IL-22 by ILC3s during DSS-induced colitis and treatment with I3C, related to Figures 1-3. **(A)** Representative flow cytometry plots depicting percentage of IL-22 producing ILC3s (CD45+Lin-CD90.2+Rorγt+). **(B)** Dot plot representing percent IL-22-producing ILC3s from experimental groups. For dot plots, significance was determined using one-way ANOVA and Tukey's multiple comparisons test. For weight data over time, two-way ANOVA and Dunnett's multiple comparisons test was used to determine significance (\*\*p<0.01, \*\*\*p<0.005, \*\*\*\*p<0.001).
